# Supplementary material for: Lack of Kcnn4 improves mucociliary clearance in muco-obstructive lung disease
Source: JCI journal article supplement (doi:10.1172/jci.insight.140076), 2020-08-19
Supplement: sd1 [file 1]

SUPPLEMENTAL FIGURE 1.

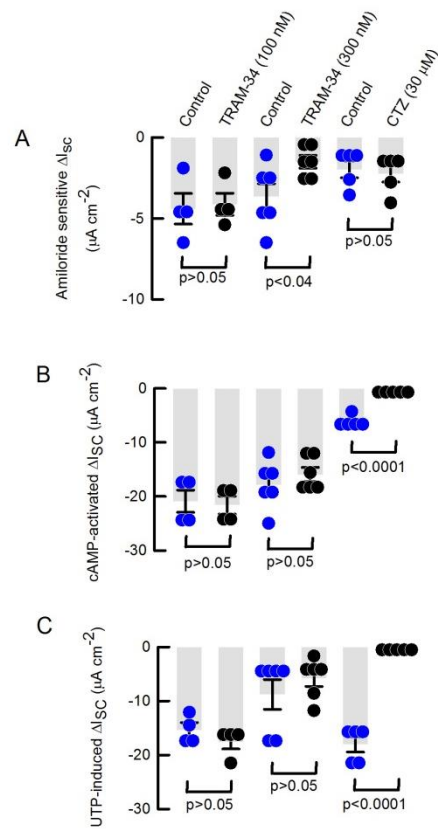

**SUPPLEMENTAL FIGURE 1. The KCa3.1 inhibitors TRAM-34 and clotrimazol (CTZ), have different effects on short-circuit currents measured in HBECS.** (A) summarizes the amiloride-sensitive sodium-absorption. (B) cAMP and (C)  $Ca^{2+}$ -induced anion secretion was affected by CTZ only. All groups correspond to paired experiments. Calculation of the cAMP-induced ISC in the CTZ and corresponding controls were calculated using the CFTR<sub>inh</sub>172 after cAMP; n=4 for TRAM-34 100 nM; n=6 for TRAM-34 300 nM and n=5 for CTZ 30  $\mu M$ . Analysis performed using Rank sum test.

SUPPLEMENTAL FIGURE 2.

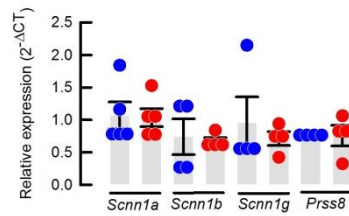

**SUPPLEMENTAL FIGURE 2. Silencing of *Kcnn4* does not induce changes in the expression of ENaC subunits or prostasin (*Prss8*).** Transcripts were isolated from airway epithelial cells from wild type (blue dots) or *Kcnn4*<sup>-/-</sup> (red dots). Values correspond to  $2^{-\Delta CT}$  normalized to Cyclophilin; n = 4–5 for each group. Statistical analysis performed using a Rank sum test.
